# Supplementary material for: ‘Garlic-lipo’4Plants: Liposome-Encapsulated Garlic Extract Stimulates ABA Pathway and PR Genes in Wheat (Triticum aestivum)
Source: MDPI journal article supplement (doi:10.3390/plants12040743), 2023-02-07
Supplement: s1 [file s1]

Supplementary (Kutasy et al. 2023)

**Figure S1.** Heatmap of Top50 differentiated gene expression (DEG) based on the comparison of 15min vs. control samples. The heatmap colour range is from red for positive Z-scores values to green for Z-score negative values. Number of differentially expressed (DE) features (Probability > 0.9): 1,712. Up-regulated (M > 0): 919. Down-regulated (M < 0): 793. Annotation of transcript IDs see in AnnotationTable (DOI: 10.17632/p66v4yxbtp.1).

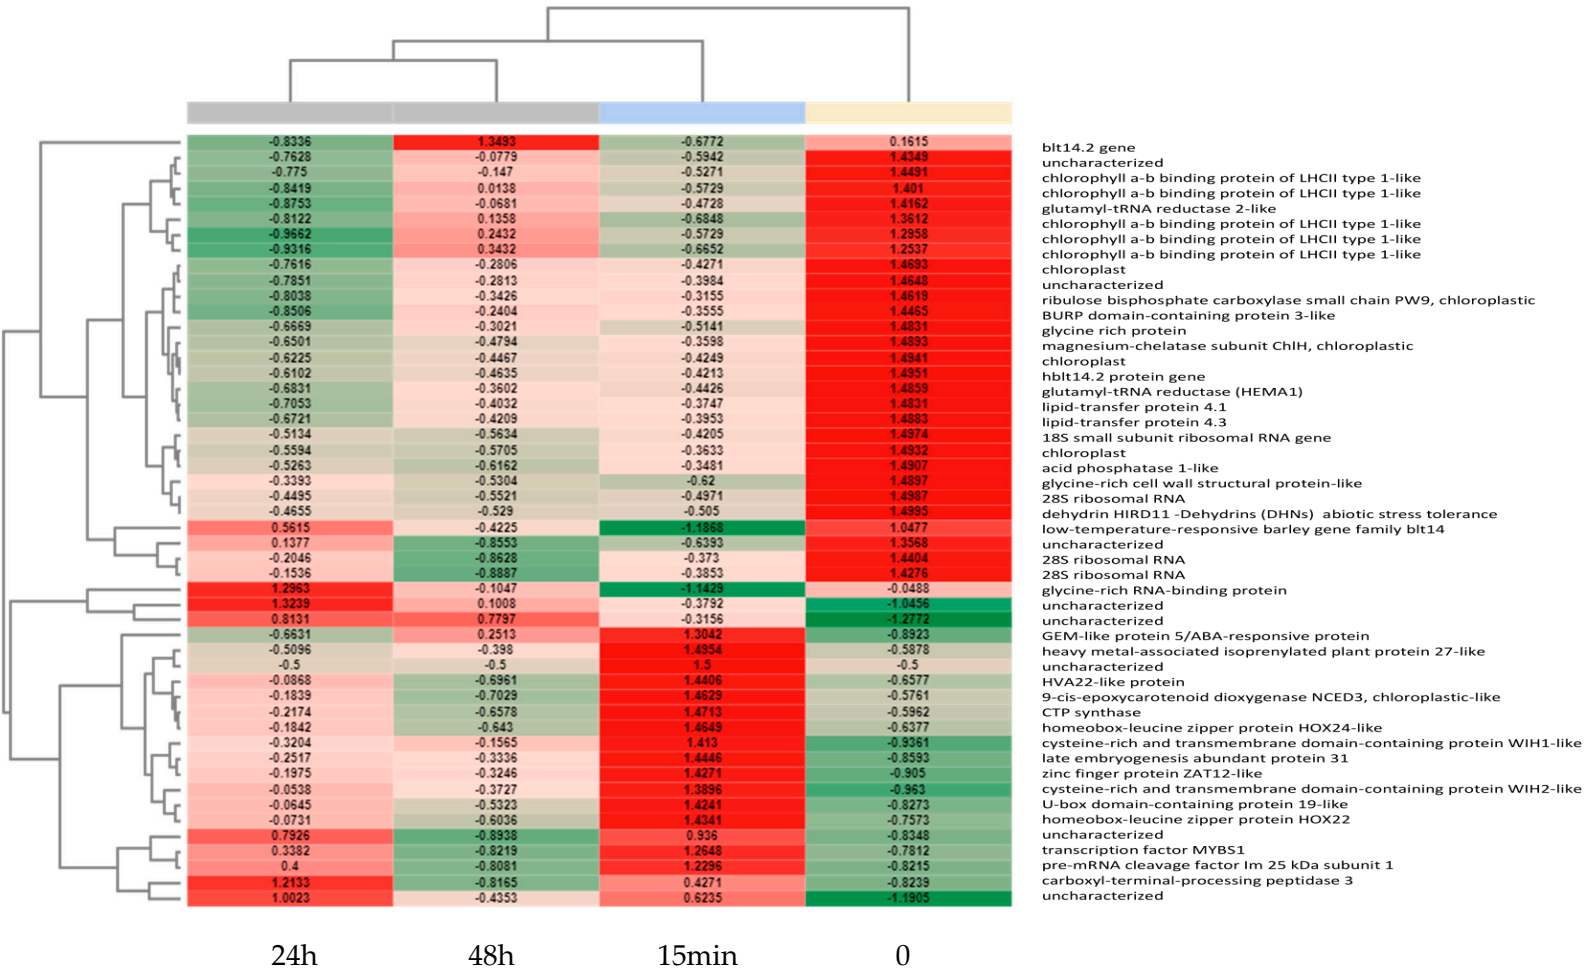

**Figure S2.** Heatmap of Top50 differentiated gene expression (DEG) based on the comparison of 24h vs. control samples. The heatmap colour range is from red for positive Z-scores values to green for Z-score negative values. Number of differentially expressed (DE) features (Probability > 0.9): 2,485. Up-regulated (M > 0): 1,279. Down-regulated (M < 0): 1,206. Annotation of transcript IDs see in AnnotationTable (DOI: 10.17632/p66v4yxbtp.1).

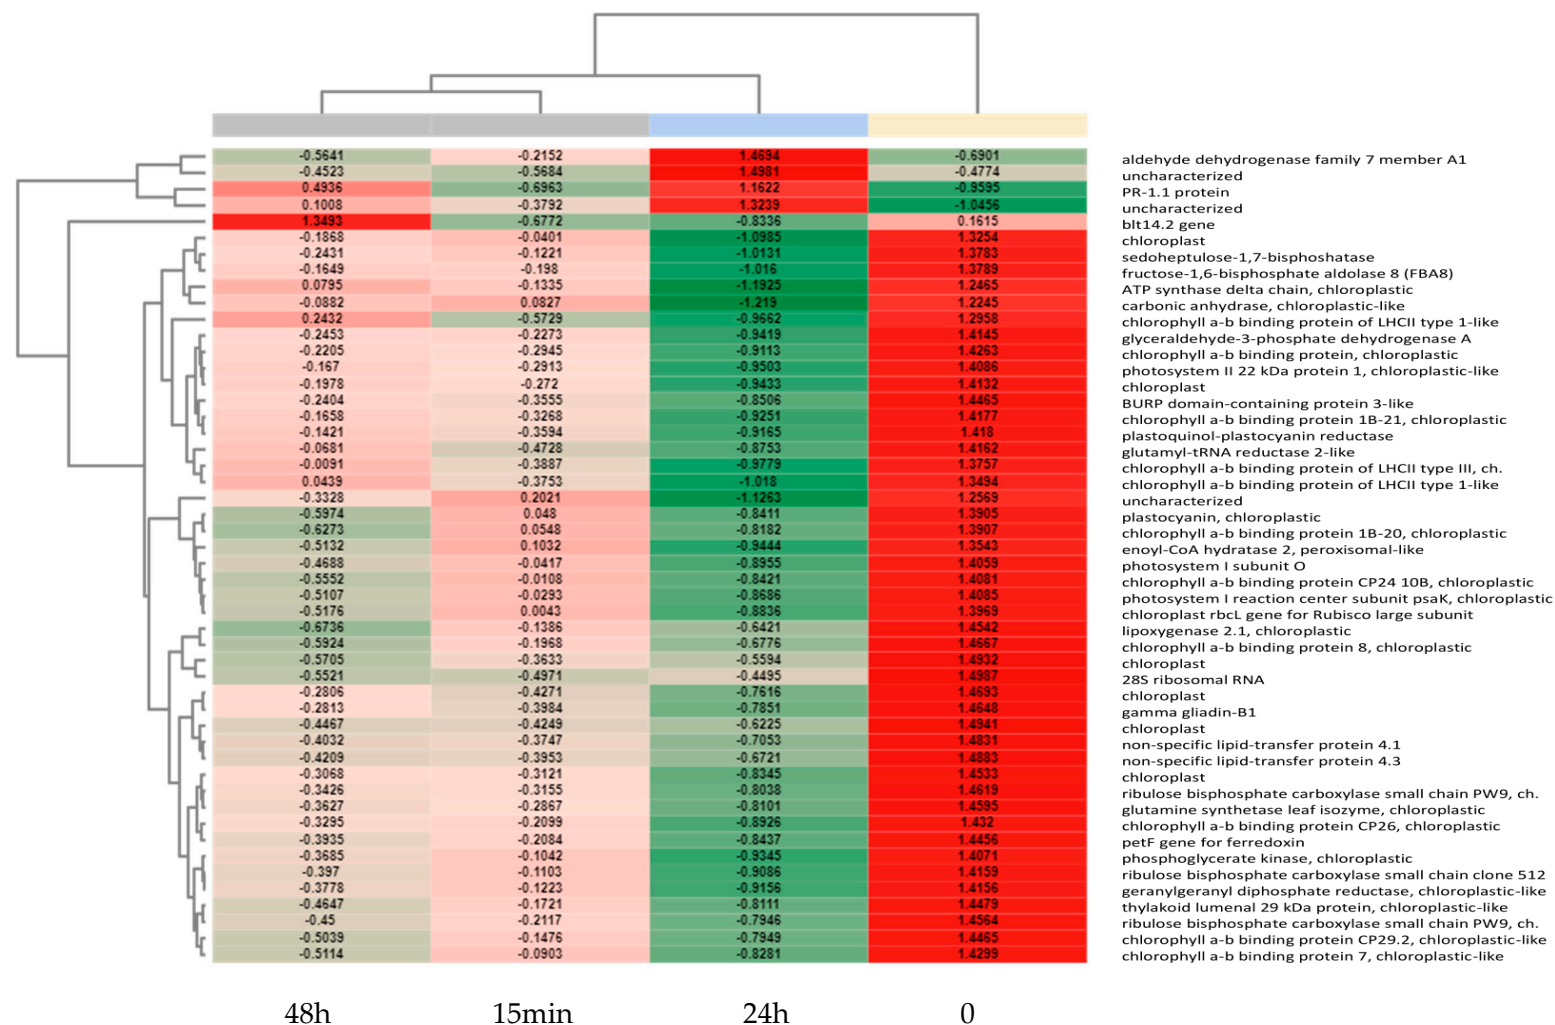

**Table S1.** Time-course expression analysis (DOI: 10.17632/xvvsxpz6w.1) of count data (using CoutTable DOI: 10.17632/xvvsxpz6w.1) was performed to detect genomic features with significant temporal expression changes and were divided into nine clusters. Differentially expressed features identified (False Discovery Rate < 0.05): 2,856. Significant features (R-squared > 0.7) according to the selection procedure: All significant features: 1,046. Significant features for each regression variable: START: 1,042; LINEAR: 689 and CURVED: 663. The genes of the nine clusters were classified also by Kyoto Encyclopedia for Genes and Genomes (KEGG) analysis and were supported by literature publications (DOI marked per genes).

| cluster<br>1 | Pathway                                                     | Enzymes<br>Codes | Enzymes Name                                                                                       | KEGG<br>Orthologs        | KEGG Orthologs Name                                                                                                                             |
|--------------|-------------------------------------------------------------|------------------|----------------------------------------------------------------------------------------------------|--------------------------|-------------------------------------------------------------------------------------------------------------------------------------------------|
| 1            | Diterpenoid biosynthesis                                    | ec:1.14.14.86    | ent-kaurene monooxygenase<br>10.1104/pp.119.2.507                                                  | ko:K21719;<br>ko:K04122  | ent-sandaracopimaradiene 3-hydroxylase<br>(CYP701A8) 10.1007/s00253-015-6496-2;<br>ent-kaurene oxidase (CYP701)<br>10.1073/pnas.95.15.9019      |
| 2            | Plant hormone signal<br>transduction                        |                  |                                                                                                    | ko:K13449                | pathogenesis-related protein 1 (PR1)<br>10.1016/j.micres.2018.04.008                                                                            |
| 3            | Monoterpenoid<br>biosynthesis                               |                  |                                                                                                    | ko:K21374                | 7-deoxyloganetin glucosyltransferase<br>(UGT85A23_24)<br>10.1074/jbc.M111.242586                                                                |
| 4            | Stilbenoid,<br>diarylheptanoid and<br>gingerol biosynthesis |                  |                                                                                                    | ko:K13065;<br>ko:K16040  | shikimate O-hydroxycinnamoyltransferase<br>(HCT) 10.1105/tpc.020297;<br>trans-resveratrol di-O-methyltransferase<br>(ROMT)10.1104/pp.108.126003 |
| 5            | Glycosphingolipid<br>biosynthesis                           | ec:2.4.1.69      | galactoside alpha-(1,2)-<br>fucosyltransferase                                                     |                          |                                                                                                                                                 |
| 6            | MAPK signaling pathway<br>- plant                           |                  |                                                                                                    | ko:K13449                | pathogenesis-related protein 1 (PR1)<br>10.1016/j.micres.2018.04.008                                                                            |
| 7            | Polyketide sugar unit<br>biosynthesis                       | ec:4.2.1.46      | dTDP-glucose 4,6-dehydratase<br>10.1139/b02-088                                                    |                          |                                                                                                                                                 |
| 8            | Flavonoid biosynthesis                                      |                  |                                                                                                    | ko:K13065                | shikimate O-hydroxycinnamoyltransferase<br>(HCT)<br>10.1105/tpc.020297                                                                          |
| 9            | Phenylpropanoid<br>biosynthesis                             | ec:2.1.1.68      | caffeate O-methyltransferase<br>10.1016/0304-4165(74)90137-8<br>10.1111/j.1438-8677.1999.tb00256.x | ko:K13065;<br>ko:K00430; | shikimate O-hydroxycinnamoyltransferase<br>(HCT); peroxidase;                                                                                   |

|    |                                                   |                              |                                                                                                   |           |                                                                |
|----|---------------------------------------------------|------------------------------|---------------------------------------------------------------------------------------------------|-----------|----------------------------------------------------------------|
|    |                                                   |                              |                                                                                                   | ko:K13066 | caffeic acid 3-O-methyltransferase (COMT)<br>10.1111/jpi.12160 |
| 10 | Pyruvate metabolism                               | ec:1.1.1.39;<br>ec:1.1.1.38  | malate dehydrogenase<br>10.1104/pp.90.2.367<br>10.1111/pbi.12556                                  |           |                                                                |
| 11 | Ether lipid metabolism                            | ec:3.1.1.47                  | 1-alkyl-2-<br>acetylgllycerophosphocholine<br>esterase                                            |           |                                                                |
| 12 | Amino sugar and<br>nucleotide sugar<br>metabolism | ec:3.2.1.14                  | chitinase<br>10.1080/07352689.2011.616043                                                         |           |                                                                |
| 13 | Porphyrin and<br>chlorophyll metabolism           | ec:3.1.1.14                  | chitinase<br>10.1080/07352689.2011.616043                                                         |           |                                                                |
| 14 | Metabolism of xenobiotics<br>by cytochrome P450   | ec:2.5.1.18                  | glutathione S-transferase<br>10.3389/fpls.2018.01836                                              | ko:K00799 | glutathione S-transferase (GST)<br>10.3389/fpls.2018.01836     |
| 15 | Glycerolipid metabolism                           | ec:1.1.1.21                  | aldose reductase<br>10.1007/s11627-000-0022-6                                                     |           |                                                                |
| 16 | Glutathione metabolism                            | ec:2.5.1.18;<br>ec:1.11.1.11 | glutathione transferase<br>10.3389/fpls.2018.01836;<br>L-ascorbate<br>peroxidase10.1271/bbb.80062 | ko:K00799 | glutathione S-transferase (GST)<br>10.3389/fpls.2018.01836     |
| 17 | Pentose and glucuronate<br>interconversions       | ec:1.1.1.21                  | aldose reductase<br>10.1007/s11738-013-1445-0                                                     |           |                                                                |
| 18 | Tryptophan metabolism                             |                              |                                                                                                   | ko:K13066 | caffeic acid 3-O-methyltransferase<br>10.1111/jpi.12160        |
| 19 | Nitrogen metabolism                               | ec:1.13.12.16                | nitronate monooxygenase<br>10.1371/journal.pone.0195488                                           |           |                                                                |
| 20 | Carbon fixation in<br>photosynthetic organisms    | ec:1.1.1.39                  | malate dehydrogenase<br>10.1104/pp.90.2.367<br>10.1093/jxb/err386                                 |           |                                                                |

|              |                                                 |                               |                                                                                                                    |                         |                                                                                                                       |
|--------------|-------------------------------------------------|-------------------------------|--------------------------------------------------------------------------------------------------------------------|-------------------------|-----------------------------------------------------------------------------------------------------------------------|
| 21           | Plant-pathogen interaction                      |                               |                                                                                                                    | ko:K13449;<br>ko:K13457 | pathogenesis-related protein 1 (PR1)<br>10.1016/j.micres.2018.04.008; resistance<br>protein (RPM1) 10.1105/tpc.010393 |
| 22           | Ascorbate and aldarate<br>metabolism            | ec:1.1.1.122;<br>ec:1.11.1.11 | D-threo-aldose 1-dehydrogenase<br>10.1007/s13562-021-00714-9;<br>L-ascorbate peroxidase<br>10.3389/fpls.2017.02262 |                         |                                                                                                                       |
| 23           | Galactose metabolism                            | ec:1.1.1.21                   | aldose reductase<br>10.1007/s11627-000-0022-6                                                                      |                         |                                                                                                                       |
| 24           | Fructose and mannose<br>metabolism              | ec:1.1.1.122;<br>ec:1.1.1.21  | D-threo-aldose 1-dehydrogenase<br>10.1007/s13562-021-00714-9;<br>aldose reductase<br>10.1007/s11627-000-0022-6     |                         |                                                                                                                       |
| cluster<br>2 | Pathway                                         | Enzymes<br>Codes              | Enzymes Name                                                                                                       | KEGG<br>Orthologs       | KEGG Orthologs Name                                                                                                   |
| 1            | Ribosome                                        |                               |                                                                                                                    | ko:K02924               | large subunit ribosomal protein L39e<br>(RPL39) 10.1111/tpj.15667                                                     |
| 2            | Glycerophospholipid<br>metabolism               | ec:2.3.1.15                   | glycerol-3-phosphate 1-O-<br>acyltransferase 10.1104/pp.68.3.653<br>10.1104/pp.112.201996                          |                         |                                                                                                                       |
| 3            | Porphyrin and<br>chlorophyll metabolism         | ec:1.14.13.122                | chlorophyllide-a oxygenase<br>10.1046/j.1365-313x.2000.00672.x                                                     |                         |                                                                                                                       |
| 4            | Aminoacyl-tRNA<br>biosynthesis                  |                               |                                                                                                                    | ko:K01886               | glutaminyl-tRNA synthetase 10.1016/S0167-<br>4781(98)00113-4<br>10.3389/fpls.2015.00735                               |
| 5            | Metabolism of xenobiotics<br>by cytochrome P450 | ec:2.5.1.18                   | glutathione S-transferase<br>10.3389/fpls.2018.01836                                                               |                         |                                                                                                                       |
| 6            | Glycerolipid metabolism                         | ec:2.3.1.15                   | glycerol-3-phosphate 1-O-<br>acyltransferase<br>10.1104/pp.112.201996                                              |                         |                                                                                                                       |
| 7            | Purine metabolism                               | ec:2.7.4.6                    | nucleoside-diphosphate kinase<br>10.1007/s00425-014-2161-8                                                         |                         |                                                                                                                       |
| 8            | Pyrimidine metabolism                           | ec:2.7.4.6                    | nucleoside-diphosphate kinase                                                                                      |                         |                                                                                                                       |

|              |                                             |                            |                                                                                                                                        |                   |                                                                                    |
|--------------|---------------------------------------------|----------------------------|----------------------------------------------------------------------------------------------------------------------------------------|-------------------|------------------------------------------------------------------------------------|
| 9            | Tyrosine metabolism                         | ec:5.2.1.2                 | maleylacetoacetate isomerase<br>10.1016/j.plantsci.2006.04.008                                                                         |                   |                                                                                    |
| 10           | Glutathione metabolism                      | ec:2.5.1.18                | glutathione S-transferase<br>10.3389/fpls.2018.01836                                                                                   |                   |                                                                                    |
| 11           | Cysteine and methionine metabolism          | ec:2.1.1.14                | S-methyltransferase<br>10.1111/j.1432-1033.1995.1053g.x                                                                                |                   |                                                                                    |
| cluster<br>3 | Pathway                                     | Enzymes<br>Codes           | Enzymes Name                                                                                                                           | KEGG<br>Orthologs | KEGG Orthologs Name                                                                |
| 1            | Biosynthesis of cofactors                   |                            |                                                                                                                                        | ko:K00059         | 3-oxoacyl-[acyl-carrier protein] reductase (OAR1) 10.1016/j.scienta.2020.109388    |
| 2            | Phenylpropanoid biosynthesis                | ec:1.1.1.195               | cinnamyl-alcohol dehydrogenase<br>10.1093/jxb/erq107<br>10.3389/fpls.2016.01723                                                        |                   |                                                                                    |
| 3            | Pyruvate metabolism                         | ec:1.1.1.79                | glyoxylate reductase (NADP+)<br>10.1093/jxb/ern122                                                                                     |                   |                                                                                    |
| 4            | Glycerophospholipid metabolism              | ec:2.1.1.103               | phosphoethanolamine N-methyltransferase<br>10.1074/jbc.M109.022657                                                                     | ko:K05929         | phosphoethanolamine N-methyltransferase (NMT)<br>10.1074/jbc.M109.022657           |
| 5            | Amino sugar and nucleotide sugar metabolism | ec:2.4.1.43;<br>ec:5.4.2.8 | polygalacturonate 4-alpha-galacturonosyltransferase<br>10.1016/0003-9861(66)90051-8;<br>phosphomannomutase<br>10.1016/j.cj.2014.07.003 | ko:K13648         | alpha-1,4-galacturonosyltransferase (GAUT)<br>10.1007/s00709-020-01508-x           |
| 6            | Biotin metabolism                           | ec:1.1.1.100               | 3-oxoacyl-[acyl-carrier-protein] reductase<br>10.1016/j.scienta.2020.109388                                                            | ko:K00059         | 3-oxoacyl-[acyl-carrier protein] reductase (OAR1)<br>10.1016/j.scienta.2020.109388 |
| 7            | Glycine, serine and threonine metabolism    | ec:1.1.1.81                | hydroxypyruvate reductase<br>10.1016/j.envexpbot.2018.10.024                                                                           |                   |                                                                                    |
| 8            | Glutathione metabolism                      | ec:1.11.1.9                | glutathione peroxidase<br>10.1371/journal.pone.0073989<br>10.1080/17429145.2018.1458913                                                |                   |                                                                                    |
| 9            | Pentose and glucuronate interconversions    |                            |                                                                                                                                        | ko:K00008         | L-iditol 2-dehydrogenase (SORD)<br>10.1007/s10725-019-00506-1                      |

|    |                                                               |                              |                                                                                                                                    |                         |                                                                                                                                        |
|----|---------------------------------------------------------------|------------------------------|------------------------------------------------------------------------------------------------------------------------------------|-------------------------|----------------------------------------------------------------------------------------------------------------------------------------|
| 10 | Fatty acid biosynthesis                                       | ec:1.1.1.100;<br>ec:2.3.1.85 | 3-oxoacyl-[acyl-carrier-protein]<br>reductase<br>10.1016/j.scienta.2020.109388;<br>fatty-acid synthase system<br>10.1021/np020289t | ko:K00059               | 3-oxoacyl-[acyl-carrier protein] reductase<br>(OAR1)<br>10.1016/j.scienta.2020.109388                                                  |
| 11 | Proteasome                                                    |                              |                                                                                                                                    | ko:K02738               | 20S proteasome subunit beta 1 (PSMB6)<br>10.1093/genetics/149.2.677                                                                    |
| 12 | Biosynthesis of<br>siderophore group<br>nonribosomal peptides | ec:1.3.1.28                  | 2,3-dihydro-2,3-dihydroxybenzoate<br><a href="https://doi.org/10.1021/np020289t">https://doi.org/10.1021/np020289t</a>             |                         |                                                                                                                                        |
| 13 | RNA transport                                                 |                              |                                                                                                                                    | ko:K03238               | translation initiation factor 2 subunit 2<br>(EIF2S2) 10.1071/FP12116<br>10.1002/pmic.200300570                                        |
| 14 | Glyoxylate and<br>dicarboxylate metabolism                    | ec:1.1.1.79;<br>ec:1.1.1.81  | glyoxylate reductase (NADP+)<br>10.1093/jxb/ern122;<br>hydroxypyruvate reductase<br>10.1016/j.envexpbot.2018.10.024                |                         |                                                                                                                                        |
| 15 | RNA degradation                                               |                              |                                                                                                                                    | ko:K12581               | CCR4-NOT transcription complex subunit<br>7/8 (CNOT7_8)<br>10.1186/s12864-018-4727-5<br>10.1038/cr.2008.317                            |
| 16 | Butanoate metabolism                                          | ec:1.1.1.30                  | 3-hydroxybutyrate dehydrogenase<br>10.1104/pp.47.6.750                                                                             |                         |                                                                                                                                        |
| 17 | Ascorbate and aldarate<br>metabolism                          | ec:1.1.1.122                 | D-threo-aldose 1-dehydrogenase<br>10.1007/s13562-021-00714-9                                                                       |                         |                                                                                                                                        |
| 18 | Photosynthesis                                                |                              |                                                                                                                                    | ko:K02635;<br>ko:K02704 | cytochrome b6 (petB)<br>10.1007/s10535-012-0290-0 ;<br>photosystem II CP47 chlorophyll apoprotein<br>(psbB)<br>10.3389/fpls.2016.00168 |
| 19 | Fructose and mannose<br>metabolism                            | ec:1.1.1.122;<br>ec:5.4.2.8  | D-threo-aldose 1-dehydrogenase<br>10.1007/s13562-021-00714-9;<br>phosphomannomutase                                                | ko:K00008               | L-iditol 2-dehydrogenase (SORD)<br>10.1007/s10725-019-00506-1                                                                          |

|              |                                              |                             |                                                                                                                            |                         |                                                                                                                               |
|--------------|----------------------------------------------|-----------------------------|----------------------------------------------------------------------------------------------------------------------------|-------------------------|-------------------------------------------------------------------------------------------------------------------------------|
|              |                                              |                             | 10.1016/j.cj.2014.07.003                                                                                                   |                         |                                                                                                                               |
| 20           | Arachidonic acid metabolism                  | ec:1.11.1.9                 | glutathione peroxidase<br>10.1371/journal.pone.0073989                                                                     |                         |                                                                                                                               |
| cluster<br>4 | Pathway                                      | Enzymes<br>Codes            | Enzymes Name                                                                                                               | KEGG<br>Orthologs       | KEGG Orthologs Name                                                                                                           |
| 1            | RNA polymerase                               |                             |                                                                                                                            | ko:K03014               | DNA-directed RNA polymerases I, II, and III subunit RPABC2<br>10.5958/2348-7542.2014.00139.9                                  |
| 2            | Biosynthesis of unsaturated fatty acids      |                             |                                                                                                                            | ko:K01068               | acyl-coenzyme A thioesterase 1/2/4 (ACOT1_2_4)<br>10.3389/fgene.2021.757920                                                   |
| 3            | Cell cycle                                   |                             |                                                                                                                            | ko:K06636;<br>ko:K06669 | structural maintenance of chromosome 1 (SMC1);<br>structural maintenance of chromosome 3 (SMC3) 10.1080/15384101.2021.1966584 |
| 4            | Biosynthesis of cofactors                    |                             |                                                                                                                            | ko:K01919               | glutamate--cysteine ligase (gshA)<br>10.1016/j.foodres.2022.111548                                                            |
| 5            | Terpenoid backbone biosynthesis              | ec:5.3.3.2                  | isopentenyl-diphosphate Delta-isomerase 10.3389/fpls.2021.755788                                                           |                         |                                                                                                                               |
| 6            | Starch and sucrose metabolism                | ec:3.2.1.2                  | beta-amylase<br>10.1016/j.plaphy.2009.05.005                                                                               | ko:K16055               | trehalose 6-phosphate synthase/phosphatase (TPS)<br>10.1007/s12041-015-0495-z                                                 |
| 7            | Glycerophospholipid metabolism               | ec:2.1.1.71;<br>ec:2.1.1.17 | phosphatidyl-N-methylethanolamine N-methyltransferase;<br>phosphatidylethanolamine N-methyltransferase 10.1093/jxb/erac049 |                         |                                                                                                                               |
| 8            | Metabolism of xenobiotics by cytochrome P450 | ec:2.5.1.18                 | glutathione S-transferase<br>10.3389/fpls.2018.01836                                                                       |                         |                                                                                                                               |
| 9            | Glutathione metabolism                       | ec:2.5.1.18;<br>ec:6.3.2.2  | glutathione S-transferase<br>10.3389/fpls.2018.01836;<br>glutamylcysteine synthetase                                       | ko:K01919               | glutamate--cysteine ligase (gshA)<br>10.1016/j.foodres.2022.111548                                                            |
| 10           | Fatty acid elongation                        |                             |                                                                                                                            | ko:K01068               | acyl-coenzyme A thioesterase 1/2/4 (ACOT1_2_4) 10.3389/fgene.2021.757920                                                      |



|    |                                                     |             |                                                                                    |                          |                                                                                                                                                  |
|----|-----------------------------------------------------|-------------|------------------------------------------------------------------------------------|--------------------------|--------------------------------------------------------------------------------------------------------------------------------------------------|
| 11 | Protein processing in endoplasmic reticulum         |             |                                                                                    | ko:K08057                | calreticulin (CALR)10.3389/fpls.2017.01086                                                                                                       |
| 12 | Ribosome                                            |             |                                                                                    | ko:K02950;<br>ko:K02946  | small subunit ribosomal protein S12 (RP-S12)<br>10.2174/0929866523666161025<br>small subunit ribosomal protein S10 (RP-S10)10.3390/ijms160920913 |
| 13 | Peroxisome                                          |             |                                                                                    | ko:K11517                | (S)-2-hydroxy-acid oxidase (HAO)<br>10.1007/s11103-019-00866-2<br>10.3390/plants11050700                                                         |
| 14 | Phagosome                                           |             |                                                                                    | ko:K02150;<br>ko:K08057  | V-type H <sup>+</sup> -transporting ATPase subunit E (ATPeV1E)<br>10.1023/A:1022341612852<br>calreticulin (CALR)10.3389/fpls.2017.01086          |
| 15 | Cytosolic DNA-sensing pathway                       |             |                                                                                    | ko:K03014                | DNA-directed RNA polymerases I, II, and III subunit RPABC2<br>10.5958/2348-7542.2014.00139.9                                                     |
| 16 | Glyoxylate and dicarboxylate metabolism             | ec:1.1.3.15 | (S)-2-hydroxy-acid oxidase<br>10.1007/s11103-019-00866-2<br>10.3390/plants11050700 | ko:K11517                | (S)-2-hydroxy-acid oxidase (HAO)<br>10.1007/s11103-019-00866-2<br>10.3390/plants11050700                                                         |
| 17 | Aminoacyl-tRNA biosynthesis                         | ec:6.1.1.20 | phenylalanyl-tRNA synthetase                                                       |                          |                                                                                                                                                  |
| 18 | Plant-pathogen interaction                          |             |                                                                                    | ko:K02358                | elongation factor Tu (tuf)<br>10.1016/j.jplph.2007.03.003                                                                                        |
| 19 | Tyrosine metabolism                                 | ec:5.2.1.2  | maleylacetoacetate isomerase<br>10.1016/j.plantsci.2006.04.008                     |                          |                                                                                                                                                  |
| 20 | Ubiquinone and other terpenoid-quinone biosynthesis | ec:1.6.5.2  | NAD(P)H dehydrogenase (quinone)<br>10.1093/mp/sst115<br>10.3389/fpls.2016.00383    |                          |                                                                                                                                                  |
| 21 | Photosynthesis                                      | ec:7.1.1.6  | plastoquinol/plastocyanin oxidoreductase<br>10.1021/bi4013534                      | ko:K08901;<br>ko:K02703; | photosystem II oxygen-evolving enhancer protein 3 (psbQ)<br>10.1016/j.envexpbot.2016.12.001                                                      |

|              |                                                |                                          |                                                                                                                  |                   |                                                                                                                                                                                                      |
|--------------|------------------------------------------------|------------------------------------------|------------------------------------------------------------------------------------------------------------------|-------------------|------------------------------------------------------------------------------------------------------------------------------------------------------------------------------------------------------|
|              |                                                |                                          |                                                                                                                  | ko:K02636         | 10.3390/plants7040100;<br>photosystem II P680 reaction center D1<br>protein (psbA)<br>10.3390/plants7040100;<br>cytochrome b6-f complex iron-sulfur subunit<br>(petC)<br>10.1016/j.jprot.2013.03.009 |
| 22           | Cutin, suberine and wax<br>biosynthesis        | ec:4.1.99.5                              | aldehyde oxygenase<br>10.1194/jlr.D080283                                                                        |                   |                                                                                                                                                                                                      |
| 23           | Cysteine and methionine<br>metabolism          | ec:6.3.2.2                               | gamma-glutamylcysteine<br>synthetase<br>10.1007/s11738-011-0746-4                                                | ko:K01919         | glutamate--cysteine ligase (gshA)<br>10.1016/j.foodres.2022.111548                                                                                                                                   |
| 24           | Oxidative<br>phosphorylation                   | ec:7.1.1.9;<br>ec:7.1.2.1;<br>ec:7.1.1.2 | cytochrome-c oxidase<br>10.1016/j.plantsci.2005.08.014 ;<br>proton-translocating ATPase;<br>ubiquinone reductase | ko:K02150         | V-type H <sup>+</sup> -transporting ATPase subunit E<br>(ATPeV1E)<br>10.1023/A:1022341612852                                                                                                         |
| cluster<br>6 | Pathway                                        | Enzymes<br>Codes                         | Enzymes Name                                                                                                     | KEGG<br>Orthologs | KEGG Orthologs Name                                                                                                                                                                                  |
| 1            | Phosphatidylinositol<br>signaling system       |                                          |                                                                                                                  | ko:K19801         | phosphatidylinositol 4-kinase B (PI4KB)<br>10.1093/jxb/ert133<br>10.1016/j.fgb.2020.103443                                                                                                           |
| 2            | Spliceosome                                    |                                          |                                                                                                                  | ko:K12822         | RNA-binding protein 25 (RBM25)<br>10.1016/j.tplants.2017.09.019                                                                                                                                      |
| 3            | Lysosome                                       |                                          |                                                                                                                  | ko:K02154         | V-type H <sup>+</sup> -transporting ATPase subunit a<br>(ATPeV0A)<br>10.1007/s00425-016-2488-4                                                                                                       |
| 4            | Protein processing in<br>endoplasmic reticulum |                                          |                                                                                                                  | ko:K04079         | molecular chaperone HtpG (HSP90A)<br>10.1007/s13562-012-0106-5                                                                                                                                       |
| 5            | Basal transcription factors                    |                                          |                                                                                                                  | ko:K03125         | transcription initiation factor TFIID subunit<br>1 (TAF1) 10.1111/tpj.13020                                                                                                                          |
| 6            | Ribosome                                       |                                          |                                                                                                                  | ko:K02904         | large subunit ribosomal protein L29 (RP-<br>L29) 10.1016/j.jprot.2020.104097                                                                                                                         |

|           |                                     |               |              |                         |                                                                                                                                                                                                 |
|-----------|-------------------------------------|---------------|--------------|-------------------------|-------------------------------------------------------------------------------------------------------------------------------------------------------------------------------------------------|
| 7         | Phagosome                           |               |              | ko:K02154               | V-type H <sup>+</sup> -transporting ATPase subunit a (ATPeV0A)<br>10.1007/s00425-016-2488-4                                                                                                     |
| 8         | NOD-like receptor signaling pathway |               |              | ko:K04079               | molecular chaperone HtpG (HSP90A)<br>10.1007/s13562-012-0106-5                                                                                                                                  |
| 9         | RNA degradation                     |               |              | ko:K12581               | CCR4-NOT transcription complex subunit 7/8 (CNOT7_8)<br>10.1186/s12864-018-4727-5<br>10.1038/cr.2008.317                                                                                        |
| 10        | Inositol phosphate metabolism       |               |              | ko:K19801               | phosphatidylinositol 4-kinase B (PI4KB)<br>10.1093/jxb/ert133<br>10.1016/j.fgb.2020.103443                                                                                                      |
| 11        | Plant-pathogen interaction          |               |              | ko:K04079               | molecular chaperone HtpG (HSP90A)<br>10.1007/s13562-012-0106-5                                                                                                                                  |
| 12        | Oxidative phosphorylation           |               |              | ko:K02132;<br>ko:K02154 | F-type H <sup>+</sup> -transporting ATPase subunit alpha (ATPeF1A)<br>10.1186/s12870-020-02552-8<br>V-type H <sup>+</sup> -transporting ATPase subunit a (ATPeV0A)<br>10.1007/s00425-016-2488-4 |
| cluster 7 | Pathway                             | Enzymes Codes | Enzymes Name | KEGG Orthologs          | KEGG Orthologs Name                                                                                                                                                                             |
| 1         | alpha-Linolenic acid metabolism     |               |              | ko:K00454               | lipoxygenase (LOX2S)<br>10.3390/ijms21020673                                                                                                                                                    |
| 2         | Linoleic acid metabolism            |               |              | ko:K00454               | lipoxygenase (LOX2S)<br>10.3390/ijms21020673                                                                                                                                                    |
| 3         | Oxidative phosphorylation           |               |              | ko:K03955               | NADH dehydrogenase (ubiquinone) 1 alpha/beta subcomplex 1 (NDUFAB1)<br>10.3390/ijms22157905                                                                                                     |
| 4         | Phenylpropanoid biosynthesis        |               |              | ko:K00430               | peroxidase<br>10.1016/S1673-8527(08)60101-0                                                                                                                                                     |
| cluster 8 | Pathway                             | Enzymes Codes | Enzymes Name | KEGG Orthologs          | KEGG Orthologs Name                                                                                                                                                                             |

|           |                                              |               |                                                      |                         |                                                                                                                                                              |
|-----------|----------------------------------------------|---------------|------------------------------------------------------|-------------------------|--------------------------------------------------------------------------------------------------------------------------------------------------------------|
| 1         | Spliceosome                                  |               |                                                      | ko:K03283               | heat shock 70kDa protein 1/2/6/8 (HSPA1s)<br>10.1038/s41598-021-89140-4                                                                                      |
| 2         | MAPK signaling pathway                       |               |                                                      | ko:K03283               | heat shock 70kDa protein 1/2/6/8 (HSPA1s)<br>10.1038/s41598-021-89140-4                                                                                      |
| 3         | Protein processing in endoplasmic reticulum  |               |                                                      | ko:K03283               | heat shock 70kDa protein 1/2/6/8 (HSPA1s)<br>10.1038/s41598-021-89140-4                                                                                      |
| 4         | Endocytosis                                  |               |                                                      | ko:K12191;<br>ko:K03283 | charged multivesicular body protein 2A (CHMP2A)<br>10.1016/j.plantsci.2019.01.017<br>heat shock 70kDa protein 1/2/6/8 (HSPA1s)<br>10.1038/s41598-021-89140-4 |
| 5         | Metabolism of xenobiotics by cytochrome P450 | ec:2.5.1.18   | glutathione S-transferase<br>10.3389/fpls.2018.01836 |                         |                                                                                                                                                              |
| 6         | Estrogen signaling pathway                   |               |                                                      | ko:K03283               | heat shock 70kDa protein 1/2/6/8 (HSPA1s)<br>10.1038/s41598-021-89140-4                                                                                      |
| 7         | Glutathione metabolism                       | ec:2.5.1.18   | glutathione S-transferase<br>10.3389/fpls.2018.01836 |                         |                                                                                                                                                              |
| cluster 9 | Pathway                                      | Enzymes Codes | Enzymes Name                                         | KEGG Orthologs          | KEGG Orthologs Name                                                                                                                                          |
| 1         | Ribosome                                     |               |                                                      | ko:K02918               | large subunit ribosomal protein L35e (RPL35)<br>10.1093/pcp/pcw074                                                                                           |
| 2         | RNA transport                                |               |                                                      | ko:K03254               | translation initiation factor 3 subunit A (EIF3A)<br><a href="https://doi.org/10.1016/j.jprot.2011.02.006">https://doi.org/10.1016/j.jprot.2011.02.006</a>   |

**Table S2.** The result of time-course expression and KEGG analysis in nine clusters was presented with contig ID (based on TSA: GJUY0000000.1) and numbers of contigs (based on CoutTable, AnnotationTable DOI: 10.17632/p66v4yxbtp.1 and Time-courseTable DOI: 10.17632/xvvsxcpz6w.1).

|    | cluster1                                                   |            |     |     |                                                                       |      |       |       |       |
|----|------------------------------------------------------------|------------|-----|-----|-----------------------------------------------------------------------|------|-------|-------|-------|
|    | Pathway                                                    | Pathway ID | #EC | #KO | Sequences                                                             | 0min | 15min | 24h   | 48h   |
| 1  | Diterpenoid biosynthesis                                   | ko00904    | 1   | 2   | TRINITY_DN10180_c0_g1                                                 | 53   | 178   | 258   | 749   |
| 2  | Plant hormone signal transduction                          | ko04075    | 0   | 1   | TRINITY_DN5387_c0_g1                                                  | 0    | 37    | 561   | 1235  |
| 3  | Monoterpenoid biosynthesis                                 | ko00902    | 0   | 1   | TRINITY_DN424_c0_g1                                                   | 199  | 218   | 313   | 487   |
| 4  | Stilbenoid, diarylheptanoid and gingerol biosynthesis      | ko00945    | 0   | 2   | TRINITY_DN7321_c0_g1;<br>TRINITY_DN601_c0_g1                          | 161  | 230   | 1099  | 4651  |
| 5  | Glycosphingolipid biosynthesis - globo and isoglobo series | ko00603    | 1   | 0   | TRINITY_DN2679_c0_g1                                                  | 108  | 113   | 117   | 179   |
| 6  | MAPK signaling pathway - plant                             | ko04016    | 0   | 1   | TRINITY_DN5387_c0_g1                                                  | 0    | 37    | 561   | 1235  |
| 7  | Polyketide sugar unit biosynthesis                         | ko00523    | 1   | 0   | TRINITY_DN414_c0_g1                                                   | 420  | 838   | 727   | 1636  |
| 8  | Flavonoid biosynthesis                                     | ko00941    | 0   | 1   | TRINITY_DN7321_c0_g1                                                  | 130  | 127   | 192   | 299   |
| 9  | Phenylpropanoid biosynthesis                               | ko00940    | 1   | 3   | TRINITY_DN7321_c0_g1;<br>TRINITY_DN7152_c0_g1;<br>TRINITY_DN991_c0_g1 | 2150 | 2707  | 3559  | 9337  |
| 10 | Pyruvate metabolism                                        | ko00620    | 2   | 0   | TRINITY_DN502_c0_g1                                                   | 407  | 502   | 498   | 652   |
| 11 | Ether lipid metabolism                                     | ko00565    | 1   | 0   | TRINITY_DN6833_c0_g1                                                  | 70   | 105   | 86    | 277   |
| 12 | Amino sugar and nucleotide sugar metabolism                | ko00520    | 1   | 0   | TRINITY_DN202_c0_g1                                                   | 3879 | 8193  | 12342 | 23057 |
| 13 | Porphyrin and chlorophyll metabolism                       | ko00860    | 1   | 0   | TRINITY_DN6833_c0_g1                                                  | 70   | 105   | 86    | 277   |
| 14 | Metabolism of xenobiotics by cytochrome P450               | ko00980    | 1   | 1   | TRINITY_DN9964_c0_g1;<br>TRINITY_DN185_c0_g1                          | 2738 | 4036  | 5171  | 10097 |
| 15 | Glycerolipid metabolism                                    | ko00561    | 1   | 0   | TRINITY_DN8397_c0_g1                                                  | 108  | 113   | 117   | 179   |
| 16 | Glutathione metabolism                                     | ko00480    | 2   | 1   | TRINITY_DN9964_c0_g1;<br>TRINITY_DN185_c0_g1;<br>TRINITY_DN991_c0_g1  | 4702 | 6332  | 7687  | 16626 |

|    |                                              |            |     |     |                                               |      |       |      |      |
|----|----------------------------------------------|------------|-----|-----|-----------------------------------------------|------|-------|------|------|
| 17 | Pentose and glucuronate interconversions     | ko00040    | 1   | 0   | TRINITY_DN8397_c0_g1                          | 0    | 17    | 81   | 385  |
| 18 | Tryptophan metabolism                        | ko00380    | 0   | 1   | TRINITY_DN7152_c0_g1                          | 56   | 284   | 851  | 2506 |
| 19 | Nitrogen metabolism                          | ko00910    | 1   | 0   | TRINITY_DN2675_c0_g1                          | 243  | 400   | 487  | 829  |
| 20 | Carbon fixation in photosynthetic organisms  | ko00710    | 1   | 0   | TRINITY_DN502_c0_g1                           | 407  | 502   | 498  | 652  |
| 21 | Plant-pathogen interaction                   | ko04626    | 0   | 2   | TRINITY_DN5387_c0_g1;<br>TRINITY_DN7016_c0_g1 | 64   | 137   | 665  | 1403 |
| 22 | Ascorbate and aldarate metabolism            | ko00053    | 2   | 0   | TRINITY_DN8397_c0_g1;<br>TRINITY_DN991_c0_g1  | 1964 | 2313  | 2597 | 6914 |
| 23 | Galactose metabolism                         | ko00052    | 1   | 0   | TRINITY_DN8397_c0_g1                          | 0    | 17    | 81   | 385  |
| 24 | Fructose and mannose metabolism              | ko00051    | 2   | 0   | TRINITY_DN8397_c0_g1                          | 0    | 17    | 81   | 385  |
|    | cluster2                                     |            |     |     |                                               |      |       |      |      |
|    | Pathway                                      | Pathway ID | #EC | #KO | Sequences                                     | 0min | 15min | 24h  | 48h  |
| 1  | Ribosome                                     | ko03010    | 0   | 1   | TRINITY_DN669_c0_g1                           | 489  | 1121  | 1335 | 615  |
| 2  | Glycerophospholipid metabolism               | ko00564    | 1   | 0   | TRINITY_DN4082_c0_g1                          | 259  | 496   | 606  | 345  |
| 3  | Porphyrin and chlorophyll metabolism         | ko00860    | 1   | 0   | TRINITY_DN4725_c0_g1                          | 122  | 458   | 622  | 217  |
| 4  | Aminoacyl-tRNA biosynthesis                  | ko00970    | 0   | 1   | TRINITY_DN669_c0_g1                           | 489  | 1121  | 1335 | 615  |
| 5  | Metabolism of xenobiotics by cytochrome P450 | ko00980    | 1   | 0   | TRINITY_DN3589_c0_g1                          | 322  | 434   | 450  | 327  |
| 6  | Glycerolipid metabolism                      | ko00561    | 1   | 0   | TRINITY_DN4082_c0_g1                          | 259  | 496   | 606  | 345  |
| 7  | Purine metabolism                            | ko00230    | 1   | 0   | TRINITY_DN844_c0_g1                           | 1196 | 2035  | 2189 | 1253 |
| 8  | Pyrimidine metabolism                        | ko00240    | 1   | 0   | TRINITY_DN844_c0_g1                           | 1196 | 2035  | 2189 | 1253 |
| 9  | Tyrosine metabolism                          | ko00350    | 1   | 0   | TRINITY_DN3589_c0_g1                          | 322  | 434   | 450  | 327  |
| 10 | Glutathione metabolism                       | ko00480    | 1   | 0   | TRINITY_DN3589_c0_g1                          | 322  | 434   | 450  | 327  |
| 11 | Cysteine and methionine metabolism           | ko00270    | 1   | 0   | TRINITY_DN58_c0_g1                            | 884  | 2058  | 2748 | 1464 |
|    | cluster3                                     |            |     |     |                                               |      |       |      |      |
|    | Pathway                                      | Pathway ID | #EC | #KO | Sequences                                     | 0min | 15min | 24h  | 48h  |

|    |                                                         |            |     |     |                                                                                               |       |       |       |       |
|----|---------------------------------------------------------|------------|-----|-----|-----------------------------------------------------------------------------------------------|-------|-------|-------|-------|
| 1  | Biosynthesis of cofactors                               | ko01240    | 0   | 1   | TRINITY_DN1641_c0_g1                                                                          | 478   | 515   | 481   | 350   |
| 2  | Phenylpropanoid biosynthesis                            | ko00940    | 1   | 0   | TRINITY_DN801_c0_g1                                                                           | 435   | 523   | 406   | 125   |
| 3  | Pyruvate metabolism                                     | ko00620    | 1   | 0   | TRINITY_DN1067_c0_g1                                                                          | 419   | 336   | 373   | 187   |
| 4  | Glycerophospholipid metabolism                          | ko00564    | 1   | 1   | TRINITY_DN6517_c0_g1                                                                          | 322   | 264   | 286   | 112   |
| 5  | Amino sugar and nucleotide sugar metabolism             | ko00520    | 2   | 1   | TRINITY_DN5508_c0_g1;<br>TRINITY_DN4810_c0_g1                                                 | 511   | 454   | 463   | 299   |
| 6  | Biotin metabolism                                       | ko00780    | 1   | 1   | TRINITY_DN1641_c0_g1                                                                          | 478   | 515   | 481   | 350   |
| 7  | Glycine, serine and threonine metabolism                | ko00260    | 1   | 0   | TRINITY_DN1067_c0_g1                                                                          | 419   | 336   | 373   | 187   |
| 8  | Glutathione metabolism                                  | ko00480    | 1   | 0   | TRINITY_DN3363_c0_g1                                                                          | 955   | 783   | 749   | 427   |
| 9  | Pentose and glucuronate interconversions                | ko00040    | 0   | 1   | TRINITY_DN801_c0_g1                                                                           | 435   | 523   | 406   | 125   |
| 10 | Fatty acid biosynthesis                                 | ko00061    | 2   | 1   | TRINITY_DN1641_c0_g1                                                                          | 478   | 515   | 481   | 350   |
| 11 | Proteasome                                              | ko03050    | 0   | 1   | TRINITY_DN2484_c0_g1                                                                          | 702   | 649   | 686   | 438   |
| 12 | Biosynthesis of siderophore group nonribosomal peptides | ko01053    | 1   | 0   | TRINITY_DN1641_c0_g1                                                                          | 478   | 515   | 481   | 350   |
| 13 | RNA transport                                           | ko03013    | 0   | 1   | TRINITY_DN973_c0_g1                                                                           | 885   | 933   | 885   | 666   |
| 14 | Glyoxylate and dicarboxylate metabolism                 | ko00630    | 2   | 0   | TRINITY_DN1067_c0_g1                                                                          | 419   | 336   | 373   | 187   |
| 15 | RNA degradation                                         | ko03018    | 0   | 1   | TRINITY_DN6783_c0_g1                                                                          | 1221  | 1180  | 1141  | 564   |
| 16 | Butanoate metabolism                                    | ko00650    | 1   | 0   | TRINITY_DN2069_c0_g1                                                                          | 1127  | 922   | 988   | 663   |
| 17 | Ascorbate and aldarate metabolism                       | ko00053    | 1   | 0   | TRINITY_DN391_c0_g1;<br>TRINITY_DN7705_c0_g1                                                  | 3097  | 2538  | 2880  | 1395  |
| 18 | Photosynthesis                                          | ko00195    | 0   | 2   | TRINITY_DN9926_c0_g1                                                                          | 63922 | 51318 | 60502 | 20877 |
| 19 | Fructose and mannose metabolism                         | ko00051    | 2   | 1   | TRINITY_DN801_c0_g1;<br>TRINITY_DN391_c0_g1;<br>TRINITY_DN4810_c0_g1;<br>TRINITY_DN7705_c0_g1 | 3728  | 3222  | 3454  | 1593  |
| 20 | Arachidonic acid metabolism                             | ko00590    | 1   | 0   | TRINITY_DN3363_c0_g1                                                                          | 955   | 783   | 749   | 427   |
|    | cluster4                                                |            |     |     |                                                                                               |       |       |       |       |
|    | Pathway                                                 | Pathway ID | #EC | #KO | Sequences                                                                                     | 0min  | 15min | 24h   | 48h   |

|    |                                                     |         |   |   |                                               |        |        |        |       |
|----|-----------------------------------------------------|---------|---|---|-----------------------------------------------|--------|--------|--------|-------|
| 1  | RNA polymerase                                      | ko03020 | 0 | 1 | TRINITY_DN466_c0_g1                           | 3058   | 2432   | 2383   | 2061  |
| 2  | Biosynthesis of unsaturated fatty acids             | ko01040 | 0 | 1 | TRINITY_DN7573_c0_g1                          | 392    | 289    | 244    | 122   |
| 3  | Cell cycle                                          | ko04110 | 0 | 2 | TRINITY_DN8524_c0_g1;<br>TRINITY_DN2736_c0_g1 | 683    | 555    | 421    | 301   |
| 4  | Biosynthesis of cofactors                           | ko01240 | 0 | 1 | TRINITY_DN1559_c0_g1                          | 1274   | 806    | 879    | 530   |
| 5  | Terpenoid backbone biosynthesis                     | ko00900 | 1 | 0 | TRINITY_DN10100_c0_g1                         | 195    | 76     | 82     | 25    |
| 6  | Starch and sucrose metabolism                       | ko00500 | 1 | 1 | TRINITY_DN80_c0_g1;<br>TRINITY_DN4973_c0_g1   | 2597   | 2039   | 1301   | 971   |
| 7  | Glycerophospholipid metabolism                      | ko00564 | 2 | 0 | TRINITY_DN7833_c0_g1                          | 216    | 171    | 135    | 83    |
| 8  | Metabolism of xenobiotics by cytochrome P450        | ko00980 | 1 | 0 | TRINITY_DN5210_c0_g1                          | 237    | 171    | 124    | 106   |
| 9  | Glutathione metabolism                              | ko00480 | 2 | 1 | TRINITY_DN5210_c0_g1;<br>TRINITY_DN1559_c0_g1 | 1511   | 977    | 1003   | 636   |
| 10 | Fatty acid elongation                               | ko00062 | 0 | 1 | TRINITY_DN7573_c0_g1                          | 392    | 289    | 244    | 122   |
| 11 | Protein processing in endoplasmic reticulum         | ko04141 | 0 | 1 | TRINITY_DN2831_c0_g1                          | 454    | 258    | 272    | 173   |
| 12 | Ribosome                                            | ko03010 | 0 | 2 | TRINITY_DN10138_c0_g1;<br>TRINITY_DN27_c0_g1  | 421836 | 141286 | 119227 | 21170 |
| 13 | Peroxisome                                          | ko04146 | 0 | 1 | TRINITY_DN41_c0_g1                            | 9788   | 5775   | 4465   | 2387  |
| 14 | Phagosome                                           | ko04145 | 0 | 2 | TRINITY_DN2831_c0_g1;<br>TRINITY_DN2386_c0_g1 | 1018   | 549    | 557    | 339   |
| 15 | Cytosolic DNA-sensing pathway                       | ko04623 | 0 | 1 | TRINITY_DN466_c0_g1                           | 3058   | 2432   | 2383   | 2061  |
| 16 | Glyoxylate and dicarboxylate metabolism             | ko00630 | 1 | 1 | TRINITY_DN41_c0_g1                            | 9788   | 5775   | 4465   | 2387  |
| 17 | Aminoacyl-tRNA biosynthesis                         | ko00970 | 1 | 0 | TRINITY_DN2707_c0_g1                          | 477    | 402    | 302    | 215   |
| 18 | Plant-pathogen interaction                          | ko04626 | 0 | 1 | TRINITY_DN1922_c0_g1                          | 7341   | 4590   | 3197   | 2291  |
| 19 | Tyrosine metabolism                                 | ko00350 | 1 | 0 | TRINITY_DN5210_c0_g1                          | 237    | 171    | 124    | 106   |
| 20 | Ubiquinone and other terpenoid-quinone biosynthesis | ko00130 | 1 | 0 | TRINITY_DN10175_c0_g1                         | 1861   | 985    | 702    | 383   |
| 21 | Photosynthesis                                      | ko00195 | 1 | 3 | TRINITY_DN80_c0_g1;<br>TRINITY_DN10252_c0_g1; | 50639  | 18943  | 21523  | 7960  |



|    |                                             |            |     |     |                                                                          |      |       |      |      |
|----|---------------------------------------------|------------|-----|-----|--------------------------------------------------------------------------|------|-------|------|------|
|    |                                             |            |     |     | TRINITY_DN99_c0_g1                                                       |      |       |      |      |
| 22 | Cutin, suberine and wax biosynthesis        | ko00073    | 1   | 0   | TRINITY_DN6773_c0_g1                                                     | 171  | 67    | 80   | 29   |
| 23 | Cysteine and methionine metabolism          | ko00270    | 1   | 1   | TRINITY_DN1559_c0_g1                                                     | 1274 | 806   | 879  | 530  |
| 24 | Oxidative phosphorylation                   | ko00190    | 3   | 1   | TRINITY_DN2386_c0_g1;<br>TRINITY_DN10172_c0_g1;<br>TRINITY_DN10175_c0_g1 | 3559 | 2135  | 1640 | 1053 |
|    | cluster6                                    |            |     |     |                                                                          |      |       |      |      |
|    | Pathway                                     | Pathway ID | #EC | #KO | Sequences                                                                | 0min | 15min | 24h  | 48h  |
| 1  | Phosphatidylinositol signaling system       | ko04070    | 0   | 1   | TRINITY_DN3650_c0_g1                                                     | 666  | 570   | 416  | 230  |
| 2  | Spliceosome                                 | ko03040    | 0   | 1   | TRINITY_DN6566_c0_g1                                                     | 442  | 489   | 405  | 186  |
| 3  | Lysosome                                    | ko04142    | 0   | 1   | TRINITY_DN3101_c0_g1                                                     | 997  | 1039  | 871  | 704  |
| 4  | Protein processing in endoplasmic reticulum | ko04141    | 0   | 1   | TRINITY_DN767_c0_g1;<br>TRINITY_DN1230_c0_g1                             | 4319 | 4357  | 3641 | 2002 |
| 5  | Basal transcription factors                 | ko03022    | 0   | 1   | TRINITY_DN6772_c0_g1                                                     | 191  | 201   | 154  | 76   |
| 6  | Ribosome                                    | ko03010    | 0   | 1   | TRINITY_DN4512_c0_g1                                                     | 394  | 347   | 255  | 138  |
| 7  | Phagosome                                   | ko04145    | 0   | 1   | TRINITY_DN3101_c0_g1                                                     | 997  | 1039  | 871  | 704  |
| 8  | NOD-like receptor signaling pathway         | ko04621    | 0   | 1   | TRINITY_DN767_c0_g1;<br>TRINITY_DN1230_c0_g1                             | 4319 | 4357  | 3641 | 2002 |
| 9  | RNA degradation                             | ko03018    | 0   | 1   | TRINITY_DN7977_c0_g1                                                     | 229  | 220   | 184  | 114  |
| 10 | Inositol phosphate metabolism               | ko00562    | 0   | 1   | TRINITY_DN3650_c0_g1                                                     | 666  | 570   | 416  | 230  |
| 11 | Plant-pathogen interaction                  | ko04626    | 0   | 1   | TRINITY_DN767_c0_g1;<br>TRINITY_DN1230_c0_g1                             | 4319 | 4357  | 3641 | 2002 |
| 12 | Oxidative phosphorylation                   | ko00190    | 0   | 2   | TRINITY_DN2836_c0_g1;<br>TRINITY_DN3101_c0_g1                            | 2459 | 2420  | 1957 | 1458 |
|    | cluster7                                    |            |     |     |                                                                          |      |       |      |      |
|    | Pathway                                     | Pathway ID | #EC | #KO | Sequences                                                                | 0min | 15min | 24h  | 48h  |
| 1  | alpha-Linolenic acid metabolism             | ko00592    | 0   | 1   | TRINITY_DN62_c0_g1                                                       | 9572 | 2480  | 238  | 98   |
| 2  | Linoleic acid metabolism                    | ko00591    | 0   | 1   | TRINITY_DN62_c0_g1                                                       | 9572 | 2480  | 238  | 98   |

|   |                                              |            |     |     |                                              |      |       |      |      |
|---|----------------------------------------------|------------|-----|-----|----------------------------------------------|------|-------|------|------|
| 3 | Oxidative phosphorylation                    | ko00190    | 0   | 1   | TRINITY_DN1772_c0_g1                         | 519  | 290   | 231  | 202  |
| 4 | Phenylpropanoid biosynthesis                 | ko00940    | 0   | 1   | TRINITY_DN898_c0_g1                          | 928  | 428   | 343  | 580  |
|   | cluster8                                     |            |     |     |                                              |      |       |      |      |
|   | Pathway                                      | Pathway ID | #EC | #KO | Sequences                                    | 0min | 15min | 24h  | 48h  |
| 1 | Spliceosome                                  | ko03040    | 0   | 1   | TRINITY_DN296_c0_g1                          | 548  | 2341  | 3793 | 2626 |
| 2 | MAPK signaling pathway                       | ko04010    | 0   | 1   | TRINITY_DN296_c0_g1                          | 548  | 2341  | 3793 | 2626 |
| 3 | Protein processing in endoplasmic reticulum  | ko04141    | 0   | 1   | TRINITY_DN296_c0_g1                          | 548  | 2341  | 3793 | 2626 |
| 4 | Endocytosis                                  | ko04144    | 0   | 2   | TRINITY_DN296_c0_g1;<br>TRINITY_DN1213_c0_g1 | 872  | 2817  | 4320 | 3147 |
| 5 | Metabolism of xenobiotics by cytochrome P450 | ko00980    | 1   | 0   | TRINITY_DN487_c0_g1;<br>TRINITY_DN8548_c0_g1 | 766  | 1277  | 1446 | 1164 |
| 6 | Glutathione metabolism                       | ko00480    | 1   | 0   | TRINITY_DN487_c0_g1;<br>TRINITY_DN8548_c0_g1 | 766  | 1277  | 1446 | 1164 |
|   | cluster9                                     |            |     |     |                                              |      |       |      |      |
|   | Pathway                                      | Pathway ID | #EC | #KO | Sequences                                    | 0min | 15min | 24h  | 48h  |
| 1 | Ribosome                                     | ko03010    | 0   | 1   | TRINITY_DN714_c0_g1                          | 1081 | 1509  | 1621 | 908  |
| 2 | RNA transport                                | ko03013    | 0   | 1   | TRINITY_DN7096_c0_g1                         | 213  | 291   | 309  | 172  |

**Table S3.** Primers of real-time PCR for the investigated gene expression were designed based on contigs of transcript dataset (TSA: GJUY00000000.1) using Primer3Plus software. Housekeeper genes were designed based on sequences of *T. aestivum* in NCBI dataset. Investigated contigs were blasted to NCBI database to control identification of sequences.

| Name   | Name                                              | Number of contig in TSA | Accession number of NCBI | Sequence (5'-3')                                      | Amplicon size (bp) |
|--------|---------------------------------------------------|-------------------------|--------------------------|-------------------------------------------------------|--------------------|
| TUBB1  | $\beta$ -tubulin1                                 | -                       | U76744.1                 | F- agtggatcccgaacaacgtc<br>R- acacgcctgaacatctctg     | 115                |
| UB1    | ubiquitin                                         | -                       | AY297059.2               | F-ggagtccacccttcacttgg<br>R- agacacaggcaccattcgag     | 130                |
| PR1    | pathogenesis-related1                             | TRINITY_DN10251_c0_g1   | AJ007348.1               | F- agtcctcgttccttgcattg<br>R- ttatttactcgcccagcccc    | 90                 |
| PR1-3  | pathogenesis-related1-3                           | TRINITY_DN4265_c0_g1    | XM_044587903.1           | F- atcacctgcaactacgagcc<br>R- atgtactgcaagacgtgca     | 80                 |
| PR4    | pathogenesis-related4 (wheatwin-2)                | TRINITY_DN82_c0_g1      | XM_044503879.1           | F- caagatcgacaccaacggga<br>R- cgtaattctagtgcggcagt    | 85                 |
| PR5    | pathogenesis-related5 (thaumatin)                 | TRINITY_DN967_c0_g1     | XM_044569611.1           | F- ccttgccatggacttctcgt<br>R- gttggggtgttggtaggctt    | 91                 |
| NCED3  | 9-cis-epoxycarotenoid dioxygenase                 | TRINITY_DN2829_c0_g1    | XM_037580089.1           | F- gcttcagtccacaccagtgt<br>R- tctgtagaagcaagcaccgg    | 146                |
| HVA22  | HVA22-like protein                                | TRINITY_DN541_c0_g1     | XM_044539374.1           | F- tggcttggtgttttcttgg<br>R- agccaccaccatctagcta      | 140                |
| PUB19  | U-box domain-containing protein19                 | TRINITY_DN897_c0_g1     | XM_044537131.1           | F- agcgtgatggatacgtgacc<br>R- cacaaggaatggtggggagg    | 101                |
| LEA31  | late embryogenesis abundant protein 31            | TRINITY_DN6620_c0_g1    | XM_044583651.1           | F- gagcatcctgtcgagtgagg<br>R- cgggccagcactgttatttg    | 85                 |
| HOX24  | homeobox-leucine zipper protein                   | TRINITY_DN7677_c0_g1    | XM_044560688.1           | F- taggatcccatgcaagc<br>R- cagagtcgacggagcagatc       | 85                 |
| DREB1G | dehydration-responsive element-binding protein 1G | TRINITY_DN1950_c0_g1    | XM_044560734.1           | F- ttggtagatggtgcacgctt<br>R- aacaccgacgaagacactcc    | 125                |
| MYBS1  | transcription factor                              | TRINITY_DN2432_c0_g1    | XM_044499707.1           | F- ttgctagtggcgtgctaca<br>R- ggatggatcggtgatggcat     | 94                 |
| ZAT12  | zinc finger protein                               | TRINITY_DN5332_c0_g1    | XM_037575759.1           | F- cgtctaggtagctggatctgc<br>R- gcaaacgtactctatcgaaccg | 90                 |

**Table S4.** Real-time PCR datasets were presented for the investigated genes. Data were analysed by the  $\Delta\Delta C_t$  method.

| Well | Fluor | Target | Content | Sample | Cq    | Cq Mean | Cq Std. Dev |
|------|-------|--------|---------|--------|-------|---------|-------------|
| A02  | SYBR  | TUB    | Unkn-05 | 1_Ctrl | 26,91 | 26,97   | 0,081       |
| B02  | SYBR  | TUB    | Unkn-05 | 1_Ctrl | 27,02 | 26,97   | 0,081       |
| C02  | SYBR  | TUB    | Unkn-06 | 2_15m  | 26,59 | 26,53   | 0,091       |
| D02  | SYBR  | TUB    | Unkn-06 | 2_15m  | 26,47 | 26,53   | 0,091       |
| E02  | SYBR  | TUB    | Unkn-07 | 3_24h  | 26,27 | 26,19   | 0,114       |
| F02  | SYBR  | TUB    | Unkn-07 | 3_24h  | 26,11 | 26,19   | 0,114       |
| G02  | SYBR  | TUB    | Unkn-08 | 4_48h  | 26,56 | 26,50   | 0,090       |
| H02  | SYBR  | TUB    | Unkn-08 | 4_48h  | 26,44 | 26,50   | 0,090       |
| A03  | SYBR  | UB     | Unkn-09 | 1_Ctrl | 25,66 | 25,54   | 0,174       |
| B03  | SYBR  | UB     | Unkn-09 | 1_Ctrl | 25,41 | 25,54   | 0,174       |
| C03  | SYBR  | UB     | Unkn-10 | 2_15m  | 24,74 | 24,72   | 0,030       |
| D03  | SYBR  | UB     | Unkn-10 | 2_15m  | 24,70 | 24,72   | 0,030       |
| E03  | SYBR  | UB     | Unkn-11 | 3_24h  | 24,44 | 24,45   | 0,026       |
| F03  | SYBR  | UB     | Unkn-11 | 3_24h  | 24,47 | 24,45   | 0,026       |
| G03  | SYBR  | UB     | Unkn-12 | 4_48h  | 25,02 | 24,91   | 0,156       |
| H03  | SYBR  | UB     | Unkn-12 | 4_48h  | 24,80 | 24,91   | 0,156       |
| A05  | SYBR  | DREB   | Unkn-17 | 1_Ctrl | 28,50 | 28,63   | 0,181       |
| B05  | SYBR  | DREB   | Unkn-17 | 1_Ctrl | 28,76 | 28,63   | 0,181       |
| C05  | SYBR  | DREB   | Unkn-18 | 2_15m  | 29,79 | 29,75   | 0,056       |
| D05  | SYBR  | DREB   | Unkn-18 | 2_15m  | 29,71 | 29,75   | 0,056       |
| E05  | SYBR  | DREB   | Unkn-19 | 3_24h  | 32,56 | 32,48   | 0,117       |
| F05  | SYBR  | DREB   | Unkn-19 | 3_24h  | 32,40 | 32,48   | 0,117       |
| G05  | SYBR  | DREB   | Unkn-20 | 4_48h  | 23,68 | 23,70   | 0,030       |
| H05  | SYBR  | DREB   | Unkn-20 | 4_48h  | 23,73 | 23,70   | 0,030       |
| A07  | SYBR  | HOX24  | Unkn-25 | 1_Ctrl | 28,15 | 27,97   | 0,262       |
| B07  | SYBR  | HOX24  | Unkn-25 | 1_Ctrl | 27,78 | 27,97   | 0,262       |

|     |      |       |         |        |       |       |       |
|-----|------|-------|---------|--------|-------|-------|-------|
| C07 | SYBR | HOX24 | Unkn-26 | 2_15m  | 24,04 | 24,05 | 0,016 |
| D07 | SYBR | HOX24 | Unkn-26 | 2_15m  | 24,06 | 24,05 | 0,016 |
| E07 | SYBR | HOX24 | Unkn-27 | 3_24h  | 25,05 | 25,03 | 0,026 |
| F07 | SYBR | HOX24 | Unkn-27 | 3_24h  | 25,01 | 25,03 | 0,026 |
| G07 | SYBR | HOX24 | Unkn-28 | 4_48h  | 29,02 | 28,92 | 0,148 |
| H07 | SYBR | HOX24 | Unkn-28 | 4_48h  | 28,81 | 28,92 | 0,148 |
| A09 | SYBR | LEA31 | Unkn-33 | 1_Ctrl | 29,16 | 29,23 | 0,099 |
| B09 | SYBR | LEA31 | Unkn-33 | 1_Ctrl | 29,30 | 29,23 | 0,099 |
| C09 | SYBR | LEA31 | Unkn-34 | 2_15m  | 25,63 | 25,61 | 0,023 |
| D09 | SYBR | LEA31 | Unkn-34 | 2_15m  | 25,60 | 25,61 | 0,023 |
| E09 | SYBR | LEA31 | Unkn-35 | 3_24h  | 26,81 | 26,83 | 0,030 |
| F09 | SYBR | LEA31 | Unkn-35 | 3_24h  | 26,85 | 26,83 | 0,030 |
| G09 | SYBR | LEA31 | Unkn-36 | 4_48h  | 27,11 | 27,13 | 0,030 |
| H09 | SYBR | LEA31 | Unkn-36 | 4_48h  | 27,15 | 27,13 | 0,030 |
| A10 | SYBR | MYB   | Unkn-37 | 1_Ctrl | 27,73 | 27,97 | 0,349 |
| B10 | SYBR | MYB   | Unkn-37 | 1_Ctrl | 28,22 | 27,97 | 0,349 |
| C10 | SYBR | MYB   | Unkn-38 | 2_15m  | 24,23 | 24,26 | 0,048 |
| D10 | SYBR | MYB   | Unkn-38 | 2_15m  | 24,30 | 24,26 | 0,048 |
| E10 | SYBR | MYB   | Unkn-39 | 3_24h  | 24,54 | 24,56 | 0,031 |
| F10 | SYBR | MYB   | Unkn-39 | 3_24h  | 24,58 | 24,56 | 0,031 |
| G10 | SYBR | MYB   | Unkn-40 | 4_48h  | 27,97 | 27,89 | 0,110 |
| H10 | SYBR | MYB   | Unkn-40 | 4_48h  | 27,81 | 27,89 | 0,110 |
| A11 | SYBR | NCED3 | Unkn-41 | 1_Ctrl | 29,06 | 28,88 | 0,248 |
| B11 | SYBR | NCED3 | Unkn-41 | 1_Ctrl | 28,71 | 28,88 | 0,248 |
| C11 | SYBR | NCED3 | Unkn-42 | 2_15m  | 23,65 | 23,70 | 0,064 |
| D11 | SYBR | NCED3 | Unkn-42 | 2_15m  | 23,74 | 23,70 | 0,064 |
| F11 | SYBR | NCED3 | Unkn-43 | 3_24h  | 25,41 | 25,41 | 0,000 |
| G11 | SYBR | NCED3 | Unkn-44 | 4_48h  | 32,29 | 32,63 | 0,473 |
| H11 | SYBR | NCED3 | Unkn-44 | 4_48h  | 32,96 | 32,63 | 0,473 |
| A14 | SYBR | PR4   | Unkn-53 | 1_Ctrl | 25,03 | 25,23 | 0,289 |

|     |      |       |         |        |       |       |       |
|-----|------|-------|---------|--------|-------|-------|-------|
| B14 | SYBR | PR4   | Unkn-53 | 1_Ctrl | 25,44 | 25,23 | 0,289 |
| C14 | SYBR | PR4   | Unkn-54 | 2_15m  | 24,29 | 24,09 | 0,288 |
| D14 | SYBR | PR4   | Unkn-54 | 2_15m  | 23,88 | 24,09 | 0,288 |
| E14 | SYBR | PR4   | Unkn-55 | 3_24h  | 20,90 | 20,93 | 0,048 |
| F14 | SYBR | PR4   | Unkn-55 | 3_24h  | 20,97 | 20,93 | 0,048 |
| G14 | SYBR | PR4   | Unkn-56 | 4_48h  | 21,89 | 21,88 | 0,022 |
| H14 | SYBR | PR4   | Unkn-56 | 4_48h  | 21,86 | 21,88 | 0,022 |
| A15 | SYBR | PR5   | Unkn-57 | 1_Ctrl | 24,57 | 24,66 | 0,116 |
| B15 | SYBR | PR5   | Unkn-57 | 1_Ctrl | 24,74 | 24,66 | 0,116 |
| C15 | SYBR | PR5   | Unkn-58 | 2_15m  | 22,98 | 23,04 | 0,095 |
| D15 | SYBR | PR5   | Unkn-58 | 2_15m  | 23,11 | 23,04 | 0,095 |
| E15 | SYBR | PR5   | Unkn-59 | 3_24h  | 21,25 | 21,26 | 0,011 |
| F15 | SYBR | PR5   | Unkn-59 | 3_24h  | 21,27 | 21,26 | 0,011 |
| G15 | SYBR | PR5   | Unkn-60 | 4_48h  | 20,33 | 20,15 | 0,246 |
| H15 | SYBR | PR5   | Unkn-60 | 4_48h  | 19,98 | 20,15 | 0,246 |
| A17 | SYBR | PUB19 | Unkn-65 | 1_Ctrl | 28,50 | 28,37 | 0,186 |
| B17 | SYBR | PUB19 | Unkn-65 | 1_Ctrl | 28,24 | 28,37 | 0,186 |
| C17 | SYBR | PUB19 | Unkn-66 | 2_15m  | 24,72 | 24,68 | 0,057 |
| D17 | SYBR | PUB19 | Unkn-66 | 2_15m  | 24,64 | 24,68 | 0,057 |
| E17 | SYBR | PUB19 | Unkn-67 | 3_24h  | 25,60 | 25,58 | 0,027 |
| F17 | SYBR | PUB19 | Unkn-67 | 3_24h  | 25,57 | 25,58 | 0,027 |
| G17 | SYBR | PUB19 | Unkn-68 | 4_48h  | 25,84 | 25,92 | 0,110 |
| H17 | SYBR | PUB19 | Unkn-68 | 4_48h  | 26,00 | 25,92 | 0,110 |
| A19 | SYBR | ZAT12 | Unkn-73 | 1_Ctrl | 29,12 | 29,10 | 0,021 |
| B19 | SYBR | ZAT12 | Unkn-73 | 1_Ctrl | 29,09 | 29,10 | 0,021 |
| C19 | SYBR | ZAT12 | Unkn-74 | 2_15m  | 25,35 | 25,29 | 0,075 |
| D19 | SYBR | ZAT12 | Unkn-74 | 2_15m  | 25,24 | 25,29 | 0,075 |
| E19 | SYBR | ZAT12 | Unkn-75 | 3_24h  | 26,41 | 26,40 | 0,019 |
| F19 | SYBR | ZAT12 | Unkn-75 | 3_24h  | 26,39 | 26,40 | 0,019 |
| G19 | SYBR | ZAT12 | Unkn-76 | 4_48h  | 26,55 | 26,40 | 0,206 |

|     |      |       |         |        |       |       |       |
|-----|------|-------|---------|--------|-------|-------|-------|
| H19 | SYBR | ZAT12 | Unkn-76 | 4_48h  | 26,26 | 26,40 | 0,206 |
| I02 | SYBR | TUB   | NTC-78  | NFW    | N/A   | 0,00  | 0,000 |
| J02 | SYBR | TUB   | NTC-78  | NFW    | N/A   | 0,00  | 0,000 |
| I03 | SYBR | UB    | NTC-79  | NFW    | N/A   | 0,00  | 0,000 |
| J03 | SYBR | UB    | NTC-79  | NFW    | N/A   | 0,00  | 0,000 |
| I05 | SYBR | DREB  | NTC-81  | NFW    | N/A   | 0,00  | 0,000 |
| J05 | SYBR | DREB  | NTC-81  | NFW    | N/A   | 0,00  | 0,000 |
| I07 | SYBR | HOX24 | NTC-83  | NFW    | N/A   | 0,00  | 0,000 |
| J07 | SYBR | HOX24 | NTC-83  | NFW    | 38,17 | 38,17 | 0,000 |
| I09 | SYBR | LEA31 | NTC-85  | NFW    | N/A   | 0,00  | 0,000 |
| J09 | SYBR | LEA31 | NTC-85  | NFW    | 37,65 | 37,65 | 0,000 |
| I10 | SYBR | MYB   | NTC-86  | NFW    | N/A   | 0,00  | 0,000 |
| J10 | SYBR | MYB   | NTC-86  | NFW    | N/A   | 0,00  | 0,000 |
| I11 | SYBR | NCED3 | NTC-87  | NFW    | 29,60 | 29,17 | 0,611 |
| J11 | SYBR | NCED3 | NTC-87  | NFW    | 28,74 | 29,17 | 0,611 |
| I14 | SYBR | PR4   | NTC-90  | NFW    | 33,69 | 36,57 | 4,075 |
| J14 | SYBR | PR4   | NTC-90  | NFW    | 39,46 | 36,57 | 4,075 |
| I15 | SYBR | PR5   | NTC-91  | NFW    | 39,61 | 38,94 | 0,941 |
| J15 | SYBR | PR5   | NTC-91  | NFW    | 38,28 | 38,94 | 0,941 |
| I17 | SYBR | PUB19 | NTC-93  | NFW    | 38,94 | 39,05 | 0,163 |
| J17 | SYBR | PUB19 | NTC-93  | NFW    | 39,17 | 39,05 | 0,163 |
| I19 | SYBR | ZAT12 | NTC-95  | NFW    | N/A   | 0,00  | 0,000 |
| J19 | SYBR | ZAT12 | NTC-95  | NFW    | 37,30 | 37,30 | 0,000 |
| A02 | SYBR | TUB   | Unkn-05 | 1_Ctrl | 26,93 | 26,98 | 0,077 |
| B02 | SYBR | TUB   | Unkn-05 | 1_Ctrl | 27,04 | 26,98 | 0,077 |
| C02 | SYBR | TUB   | Unkn-06 | 2_15m  | 26,61 | 26,55 | 0,092 |
| D02 | SYBR | TUB   | Unkn-06 | 2_15m  | 26,48 | 26,55 | 0,092 |
| E02 | SYBR | TUB   | Unkn-07 | 3_24h  | 26,29 | 26,21 | 0,114 |
| F02 | SYBR | TUB   | Unkn-07 | 3_24h  | 26,13 | 26,21 | 0,114 |
| G02 | SYBR | TUB   | Unkn-08 | 4_48h  | 26,58 | 26,52 | 0,090 |

|     |      |       |         |        |       |       |       |
|-----|------|-------|---------|--------|-------|-------|-------|
| H02 | SYBR | TUB   | Unkn-08 | 4_48h  | 26,45 | 26,52 | 0,090 |
| A03 | SYBR | UB    | Unkn-09 | 1_Ctrl | 25,67 | 25,55 | 0,175 |
| B03 | SYBR | UB    | Unkn-09 | 1_Ctrl | 25,43 | 25,55 | 0,175 |
| C03 | SYBR | UB    | Unkn-10 | 2_15m  | 24,76 | 24,74 | 0,031 |
| D03 | SYBR | UB    | Unkn-10 | 2_15m  | 24,72 | 24,74 | 0,031 |
| E03 | SYBR | UB    | Unkn-11 | 3_24h  | 24,45 | 24,47 | 0,027 |
| F03 | SYBR | UB    | Unkn-11 | 3_24h  | 24,49 | 24,47 | 0,027 |
| G03 | SYBR | UB    | Unkn-12 | 4_48h  | 25,03 | 24,92 | 0,152 |
| H03 | SYBR | UB    | Unkn-12 | 4_48h  | 24,81 | 24,92 | 0,152 |
| A08 | SYBR | HVA22 | Unkn-29 | 1_Ctrl | 26,90 | 26,77 | 0,188 |
| B08 | SYBR | HVA22 | Unkn-29 | 1_Ctrl | 26,64 | 26,77 | 0,188 |
| C08 | SYBR | HVA22 | Unkn-30 | 2_15m  | 22,17 | 22,17 | 0,010 |
| D08 | SYBR | HVA22 | Unkn-30 | 2_15m  | 22,16 | 22,17 | 0,010 |
| E08 | SYBR | HVA22 | Unkn-31 | 3_24h  | 24,07 | 24,08 | 0,020 |
| F08 | SYBR | HVA22 | Unkn-31 | 3_24h  | 24,09 | 24,08 | 0,020 |
| G08 | SYBR | HVA22 | Unkn-32 | 4_48h  | 27,88 | 27,91 | 0,037 |
| H08 | SYBR | HVA22 | Unkn-32 | 4_48h  | 27,93 | 27,91 | 0,037 |
| A12 | SYBR | PR3   | Unkn-45 | 1_Ctrl | 32,80 | 32,55 | 0,361 |
| B12 | SYBR | PR3   | Unkn-45 | 1_Ctrl | 32,29 | 32,55 | 0,361 |
| C12 | SYBR | PR3   | Unkn-46 | 2_15m  | 31,30 | 31,29 | 0,014 |
| D12 | SYBR | PR3   | Unkn-46 | 2_15m  | 31,28 | 31,29 | 0,014 |
| E12 | SYBR | PR3   | Unkn-47 | 3_24h  | 28,94 | 29,03 | 0,128 |
| F12 | SYBR | PR3   | Unkn-47 | 3_24h  | 29,12 | 29,03 | 0,128 |
| G12 | SYBR | PR3   | Unkn-48 | 4_48h  | 28,60 | 28,58 | 0,032 |
| H12 | SYBR | PR3   | Unkn-48 | 4_48h  | 28,56 | 28,58 | 0,032 |
| A13 | SYBR | PR1   | Unkn-49 | 1_Ctrl | 26,13 | 26,05 | 0,126 |
| B13 | SYBR | PR1   | Unkn-49 | 1_Ctrl | 25,96 | 26,05 | 0,126 |
| C13 | SYBR | PR1   | Unkn-50 | 2_15m  | 23,77 | 23,81 | 0,047 |
| D13 | SYBR | PR1   | Unkn-50 | 2_15m  | 23,84 | 23,81 | 0,047 |
| E13 | SYBR | PR1   | Unkn-51 | 3_24h  | 21,17 | 21,12 | 0,081 |



|     |      |       |         |        |       |       |       |
|-----|------|-------|---------|--------|-------|-------|-------|
| F13 | SYBR | PR1   | Unkn-51 | 3_24h  | 21,06 | 21,12 | 0,081 |
| G13 | SYBR | PR1   | Unkn-52 | 4_48h  | 19,82 | 19,70 | 0,170 |
| H13 | SYBR | PR1   | Unkn-52 | 4_48h  | 19,58 | 19,70 | 0,170 |
| A16 | SYBR | PR6   | Unkn-61 | 1_Ctrl | 36,32 | 36,47 | 0,208 |
| B16 | SYBR | PR6   | Unkn-61 | 1_Ctrl | 36,62 | 36,47 | 0,208 |
| C16 | SYBR | PR6   | Unkn-62 | 2_15m  | 36,15 | 35,38 | 1,088 |
| D16 | SYBR | PR6   | Unkn-62 | 2_15m  | 34,61 | 35,38 | 1,088 |
| E16 | SYBR | PR6   | Unkn-63 | 3_24h  | 34,01 | 34,04 | 0,032 |
| F16 | SYBR | PR6   | Unkn-63 | 3_24h  | 34,06 | 34,04 | 0,032 |
| G16 | SYBR | PR6   | Unkn-64 | 4_48h  | 34,68 | 35,26 | 0,827 |
| H16 | SYBR | PR6   | Unkn-64 | 4_48h  | 35,85 | 35,26 | 0,827 |
| I02 | SYBR | TUB   | NTC-78  | NFW    | N/A   | 0,00  | 0,000 |
| J02 | SYBR | TUB   | NTC-78  | NFW    | N/A   | 0,00  | 0,000 |
| I03 | SYBR | UB    | NTC-79  | NFW    | N/A   | 0,00  | 0,000 |
| J03 | SYBR | UB    | NTC-79  | NFW    | N/A   | 0,00  | 0,000 |
| I08 | SYBR | HVA22 | NTC-84  | NFW    | N/A   | 0,00  | 0,000 |
| J08 | SYBR | HVA22 | NTC-84  | NFW    | 38,86 | 38,86 | 0,000 |
| I12 | SYBR | PR3   | NTC-88  | NFW    | N/A   | 0,00  | 0,000 |
| J12 | SYBR | PR3   | NTC-88  | NFW    | N/A   | 0,00  | 0,000 |
| I13 | SYBR | PR1   | NTC-89  | NFW    | 35,90 | 34,02 | 2,650 |
| J13 | SYBR | PR1   | NTC-89  | NFW    | 32,15 | 34,02 | 2,650 |
| I16 | SYBR | PR6   | NTC-92  | NFW    | 35,60 | 36,04 | 0,614 |
| J16 | SYBR | PR6   | NTC-92  | NFW    | 36,47 | 36,04 | 0,614 |

| Target | Sample | Expression<br>ddCq-method | Expression<br>SEM |
|--------|--------|---------------------------|-------------------|
| PR1    | Ctrl   | 1,00                      | 0,077             |
|        | 15m    | 3,06                      | 0,101             |
|        | 24h    | 16,00                     | 0,784             |

|       |      |       |       |
|-------|------|-------|-------|
|       | 48h  | 55,52 | 5,213 |
| PR3   | Ctrl | 1,00  | 0,183 |
|       | 15m  | 1,55  | 0,038 |
|       | 24h  | 6,00  | 0,414 |
|       | 48h  | 10,71 | 0,494 |
| PR4   | Ctrl | 1,00  | 0,149 |
|       | 15m  | 1,43  | 0,205 |
|       | 24h  | 10,35 | 0,383 |
|       | 48h  | 7,00  | 0,319 |
| PR5   | Ctrl | 1,00  | 0,074 |
|       | 15m  | 1,98  | 0,103 |
|       | 24h  | 5,53  | 0,162 |
|       | 48h  | 15,52 | 1,991 |
| PR6   | Ctrl | 1,00  | 0,112 |
|       | 15m  | 1,38  | 0,739 |
|       | 24h  | 2,84  | 0,093 |
|       | 48h  | 1,58  | 0,644 |
| NCED3 | Ctrl | 1,00  | 0,130 |
|       | 15m  | 23,62 | 0,925 |
|       | 24h  | 5,83  | 0,237 |
|       | 48h  | 0,05  | 0,012 |
| HVA22 | Ctrl | 1,00  | 0,103 |
|       | 15m  | 15,75 | 0,384 |
|       | 24h  | 3,39  | 0,103 |
|       | 48h  | 0,31  | 0,015 |
| PUB19 | Ctrl | 1,00  | 0,102 |
|       | 15m  | 8,39  | 0,306 |
|       | 24h  | 3,63  | 0,115 |

|        |      |       |       |
|--------|------|-------|-------|
|        | 48h  | 3,74  | 0,260 |
| LEA31  | Ctrl | 1,00  | 0,068 |
|        | 15m  | 7,92  | 0,206 |
|        | 24h  | 2,77  | 0,090 |
|        | 48h  | 2,91  | 0,136 |
| HOX24  | Ctrl | 1,00  | 0,137 |
|        | 15m  | 9,79  | 0,243 |
|        | 24h  | 4,03  | 0,127 |
|        | 48h  | 0,35  | 0,030 |
| DREB1G | Ctrl | 1,00  | 0,101 |
|        | 15m  | 0,30  | 0,011 |
|        | 24h  | 0,04  | 0,002 |
|        | 48h  | 20,77 | 0,968 |
| MYB    | Ctrl | 1,00  | 0,178 |
|        | 15m  | 8,48  | 0,283 |
|        | 24h  | 5,59  | 0,181 |
|        | 48h  | 0,72  | 0,051 |
| ZAT12  | Ctrl | 1,00  | 0,048 |
|        | 15m  | 9,08  | 0,395 |
|        | 24h  | 3,42  | 0,103 |
|        | 48h  | 4,45  | 0,491 |
